# Supplementary material
Source: MDPI journal article supplement (https://www.mdpi.com/1424-8247/14/3/180)
Supplement: s1 [file s1]

Supplemental material to:

Treatment of early allergic and late inflammatory symptoms of allergic rhinitis with *Petasites hybridus* leaf extract (Ze 339): Results of a non-interventional observational study in Switzerland

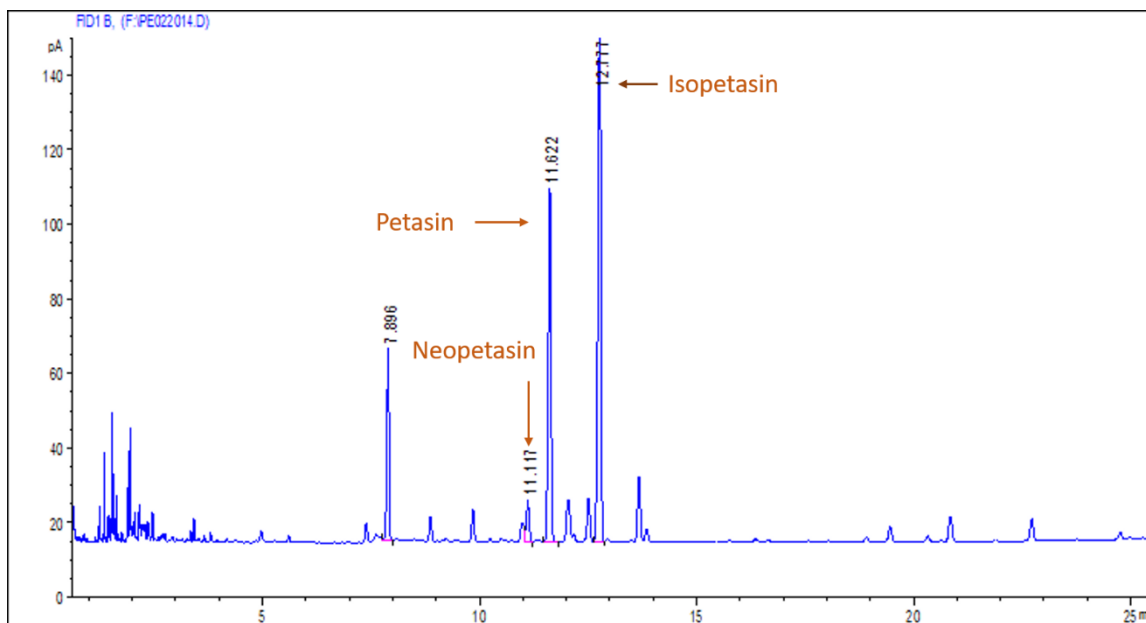

**Figure S1:** Gas chromatogram of *Petasites hybridus* leaf extract Ze 339 (batch 091376). Quantitative determination of total petasins (petasin, isopetasin, neopetasin), the active compounds of Ze 339 using gas chromatography and a flame ionization detector (FID). GC-column 100% polydimethylsiloxane (e.g. DB-1, length: 25 m, ID: 0.32 mm, dF: 0.52  $\mu$ m); Injector temperature: 270  $^{\circ}$ C; Injection volume 1  $\mu$ L.
